# S1\_raw\_images

In Fig 4 of the manuscript, mirrored images of id5 are displayed (in the order left to right: 21, 20, 19, 18) except for pS6 and S6 where id1 is displayed (in the order left to right: 1, 2, 3, 4)

The sample id is shown with red on the next page and is identical for all blots.

The interventions for each sample id is shown on the right.

## Order of samples:

- 1: id1 CTR basal
- 2: id1 CTR clamp
- 3: id1 LPS basal
- 4: id1 LPS clamp
- 5: id2 LPS basal
- 6: id2 LPS clamp
- 7: id2 CTR basal
- 8: id2 CTR clamp
- 9: *internal control*
- 10: id3 CTR basal
- 11: id3 CTR clamp
- 12: id3 LPS basal
- 13: id3 LPS clamp
- 14: id4 CTR basal
- 15: id4 CTR clamp
- 16: id4 LPS basal
- 17: id4 LPS clamp
- 18: id5 LPS basal
- 19: id5 LPS clamp
- 20: id5 CTR basal
- 21: id5 CTR clamp
- 22: id6 LPS basal
- 23: id6 LPS clamp
- 24: id6 CTR basal
- 25: id6 CTR clamp
- 26: *internal control*

pAKT\_raw\_image

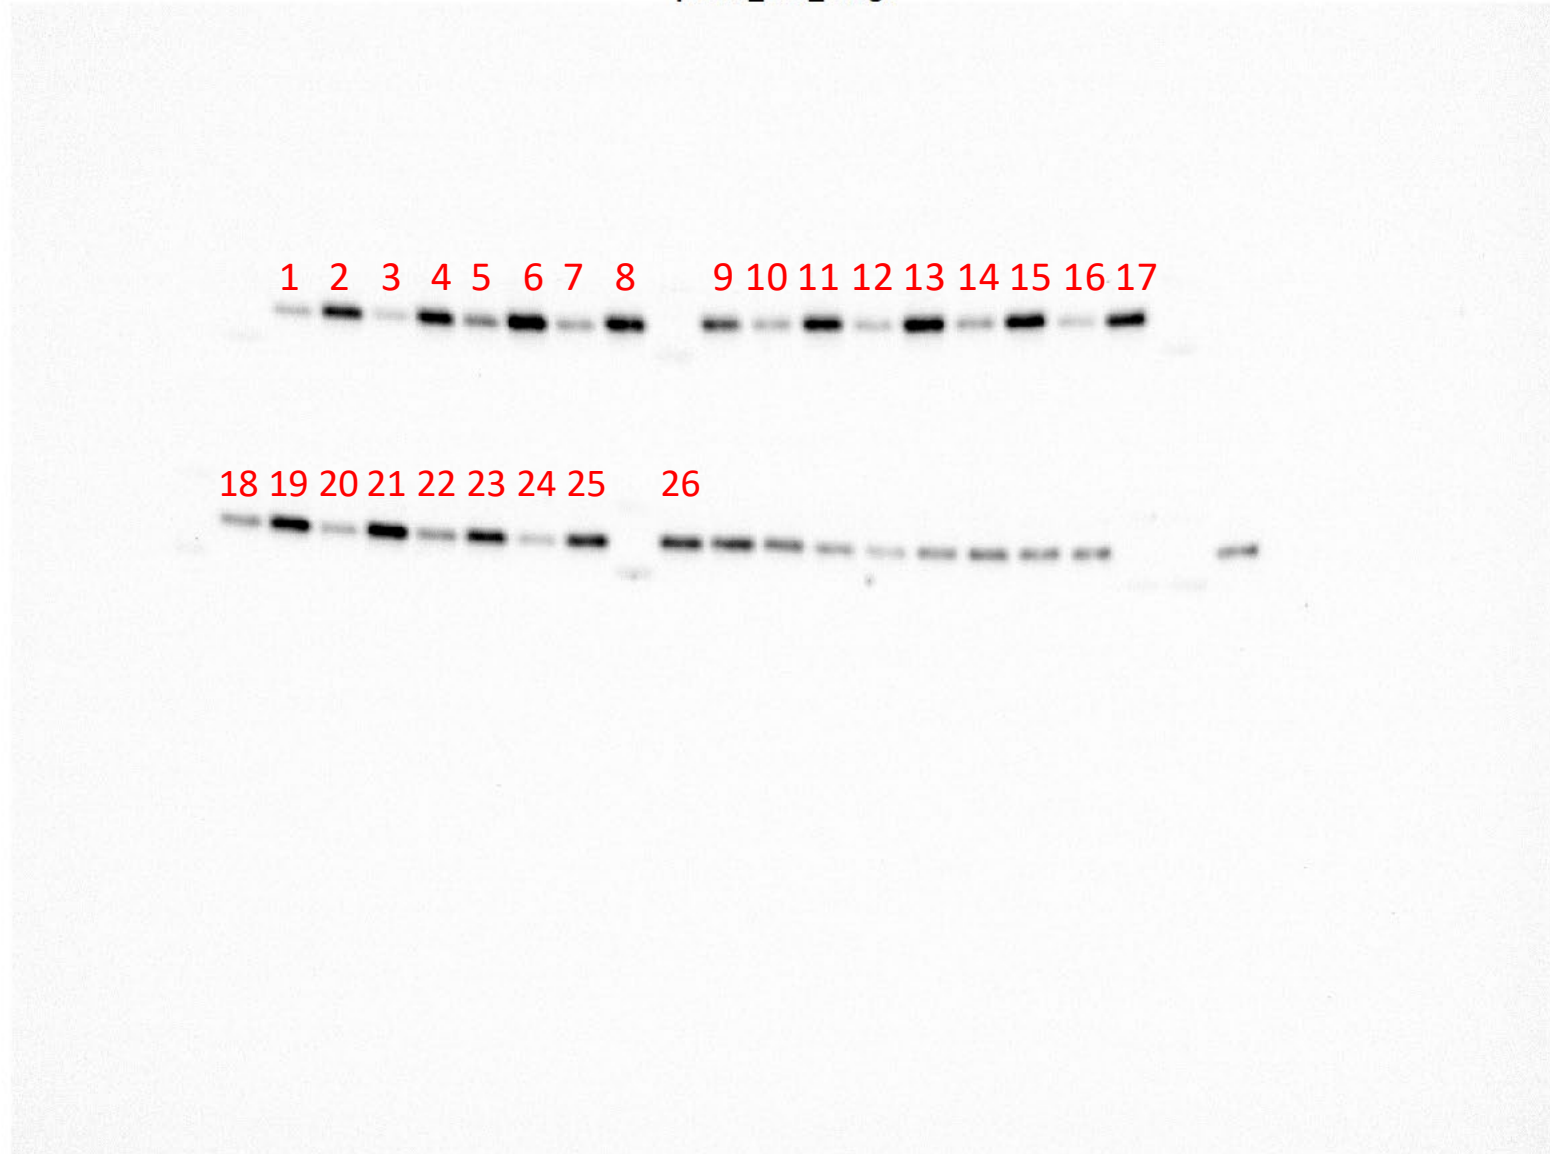

AKT\_raw\_image

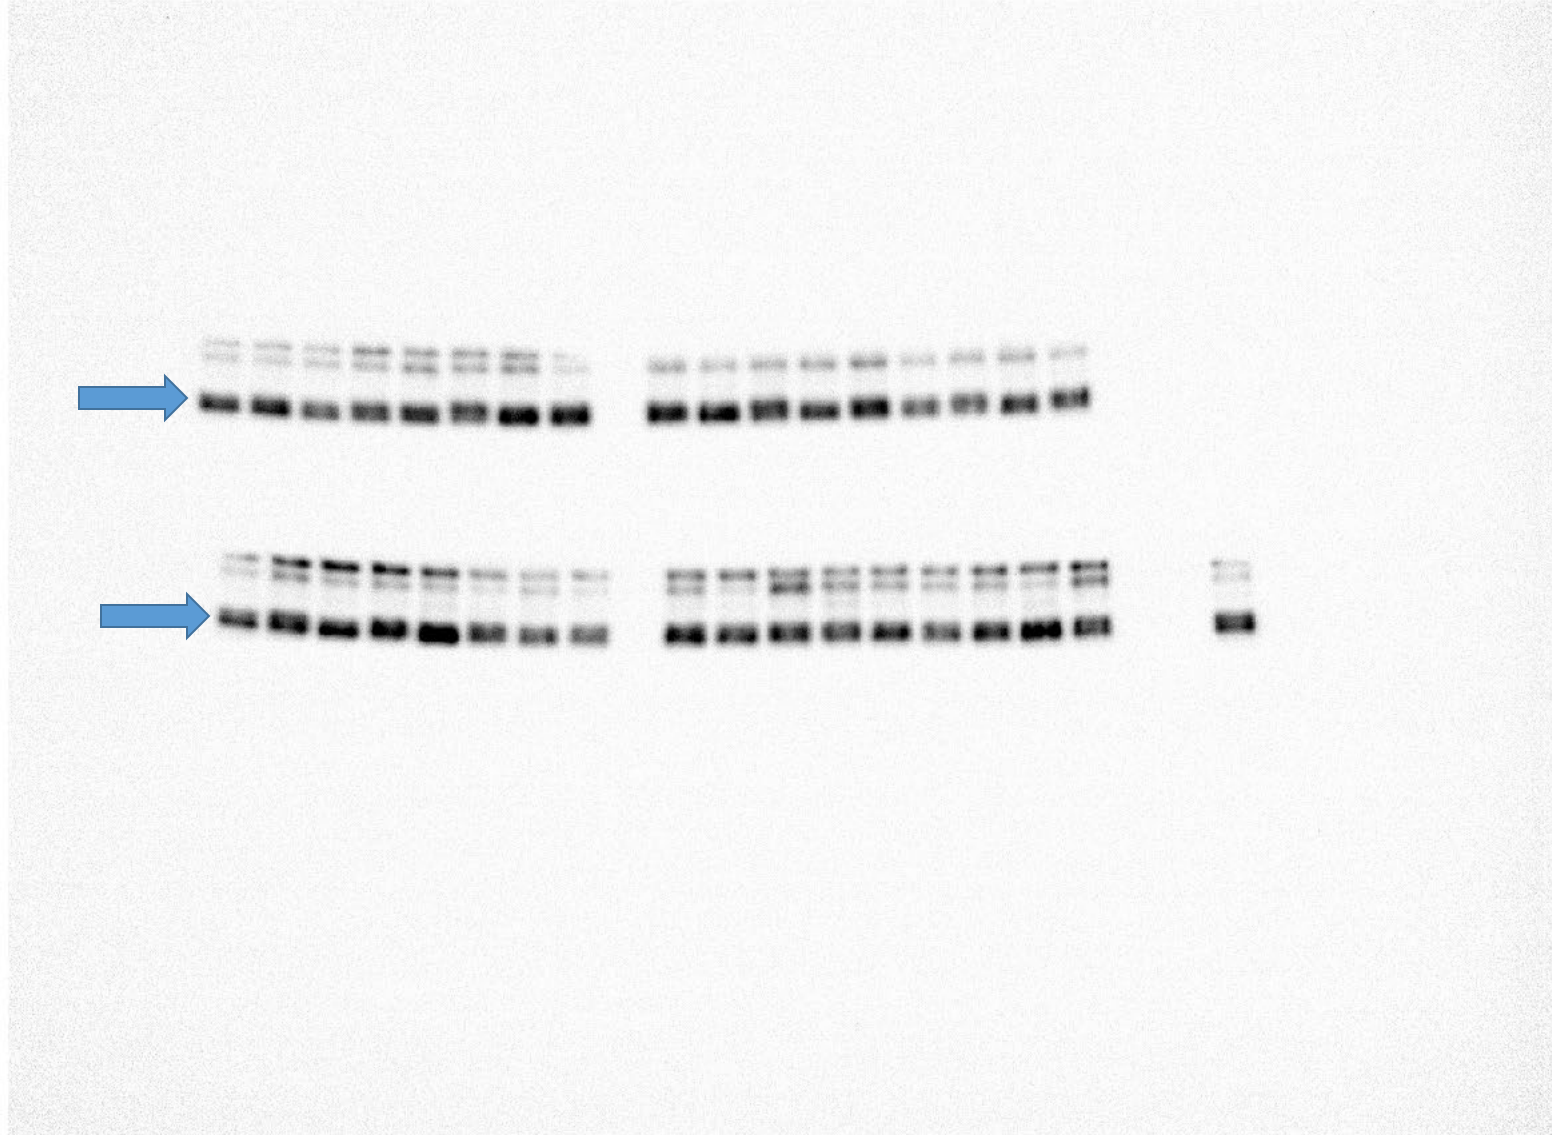

pmTOR\_raw\_image

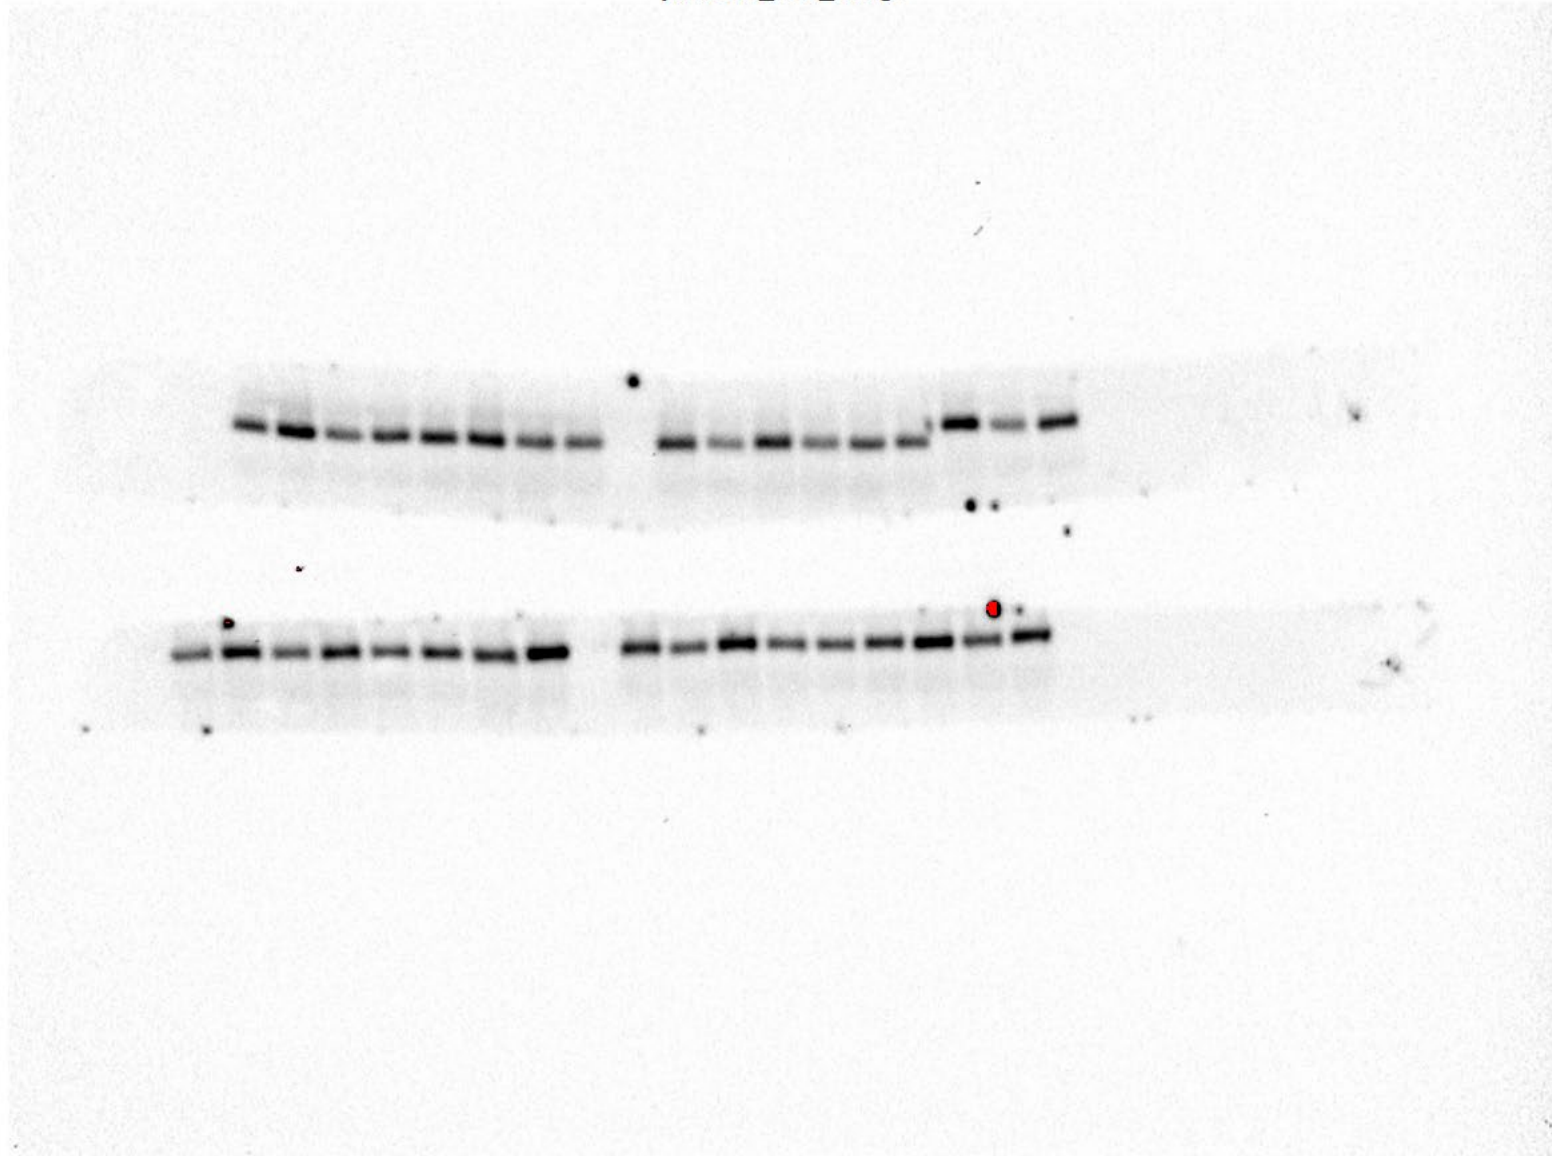

mTOR\_raw\_image

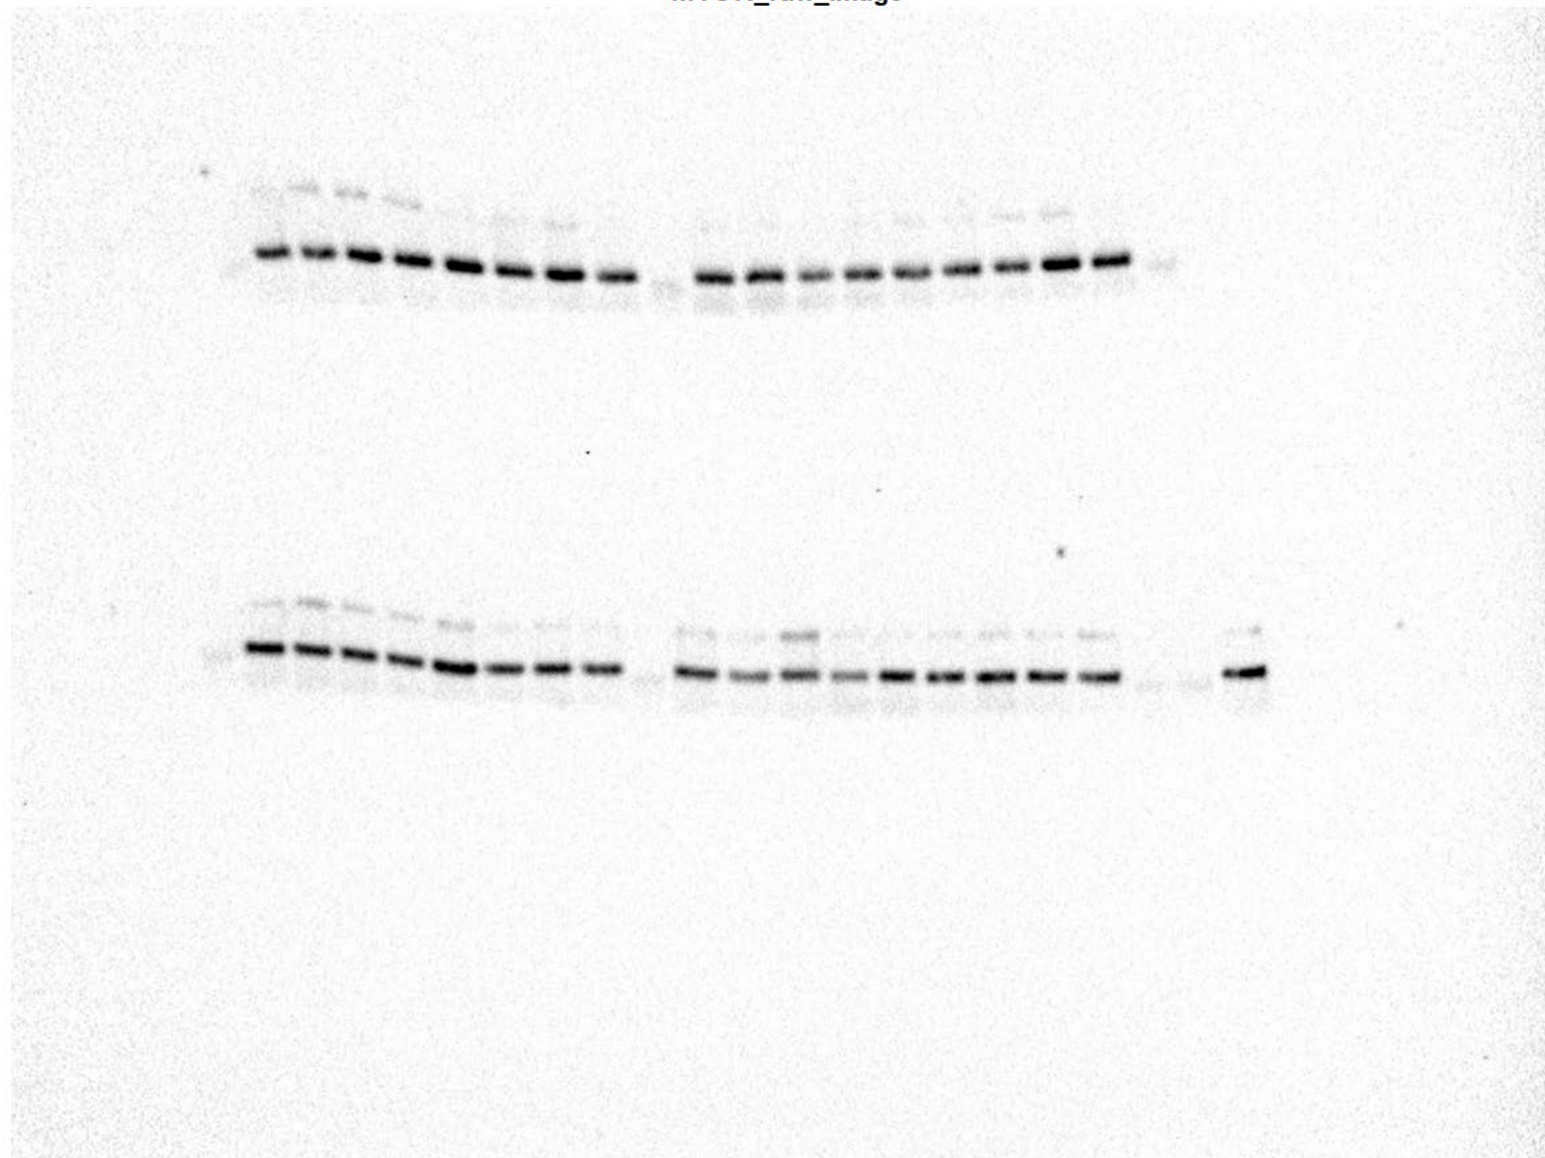

pS6\_raw\_image

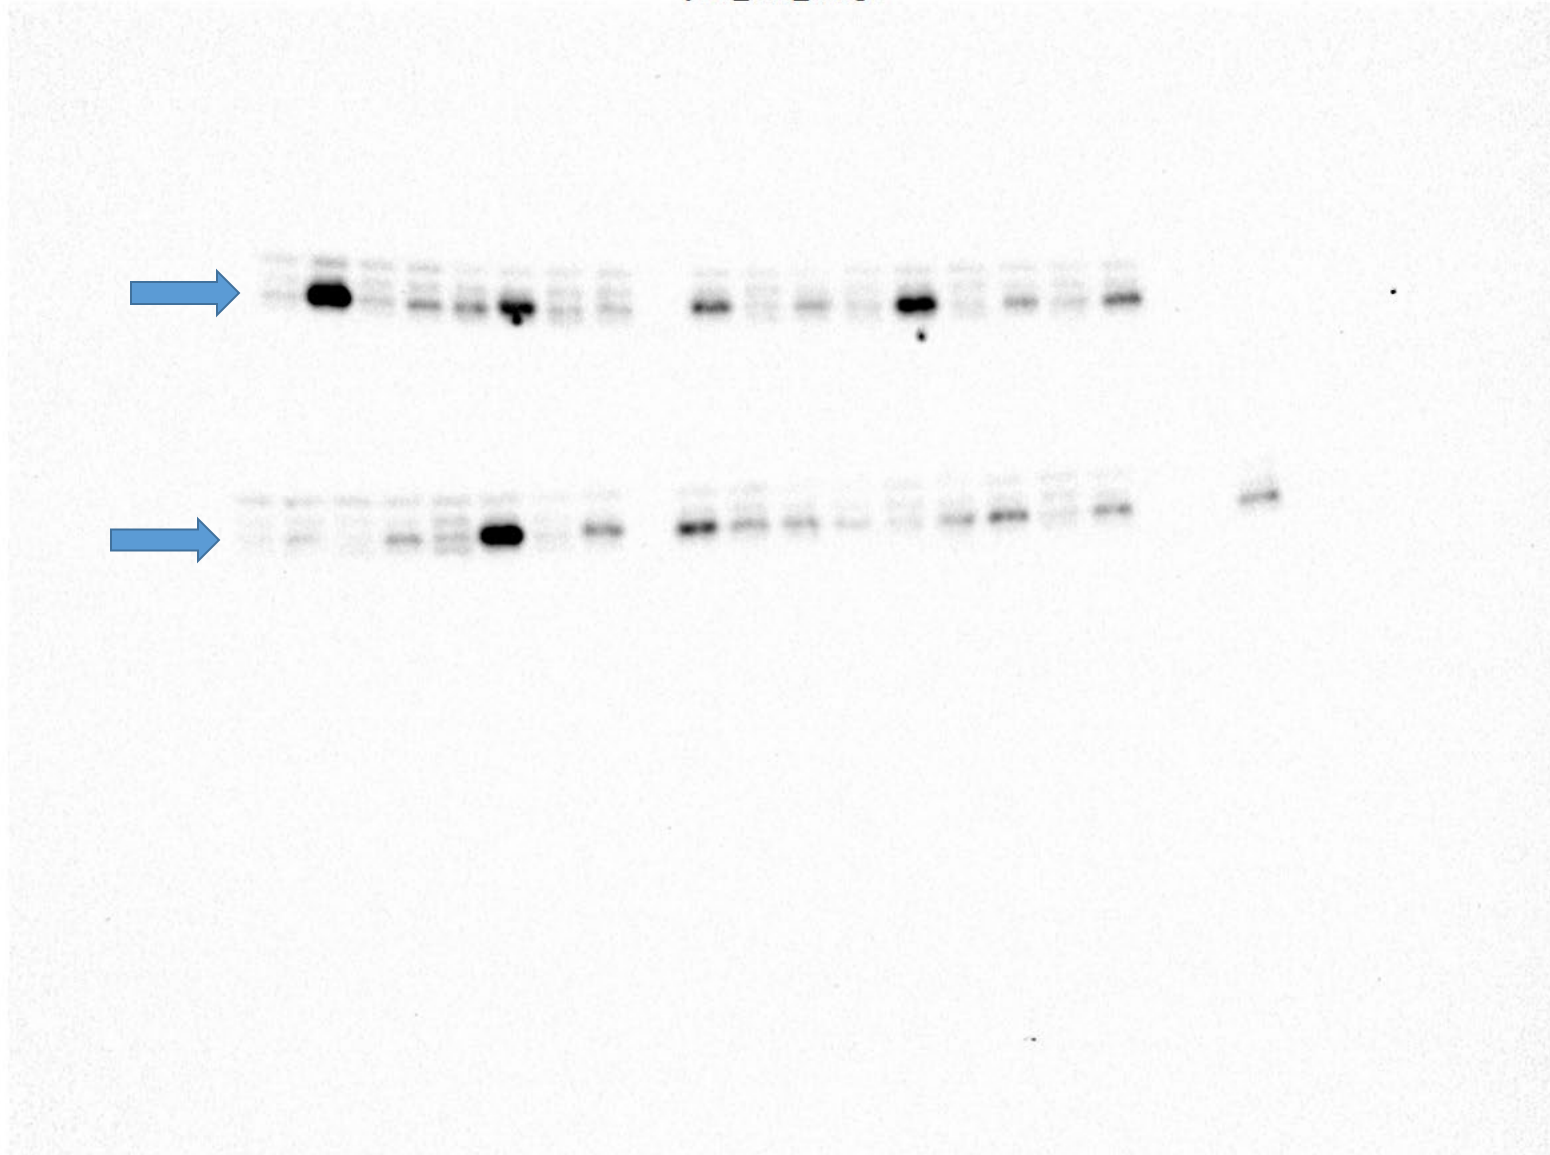

S6\_raw\_image

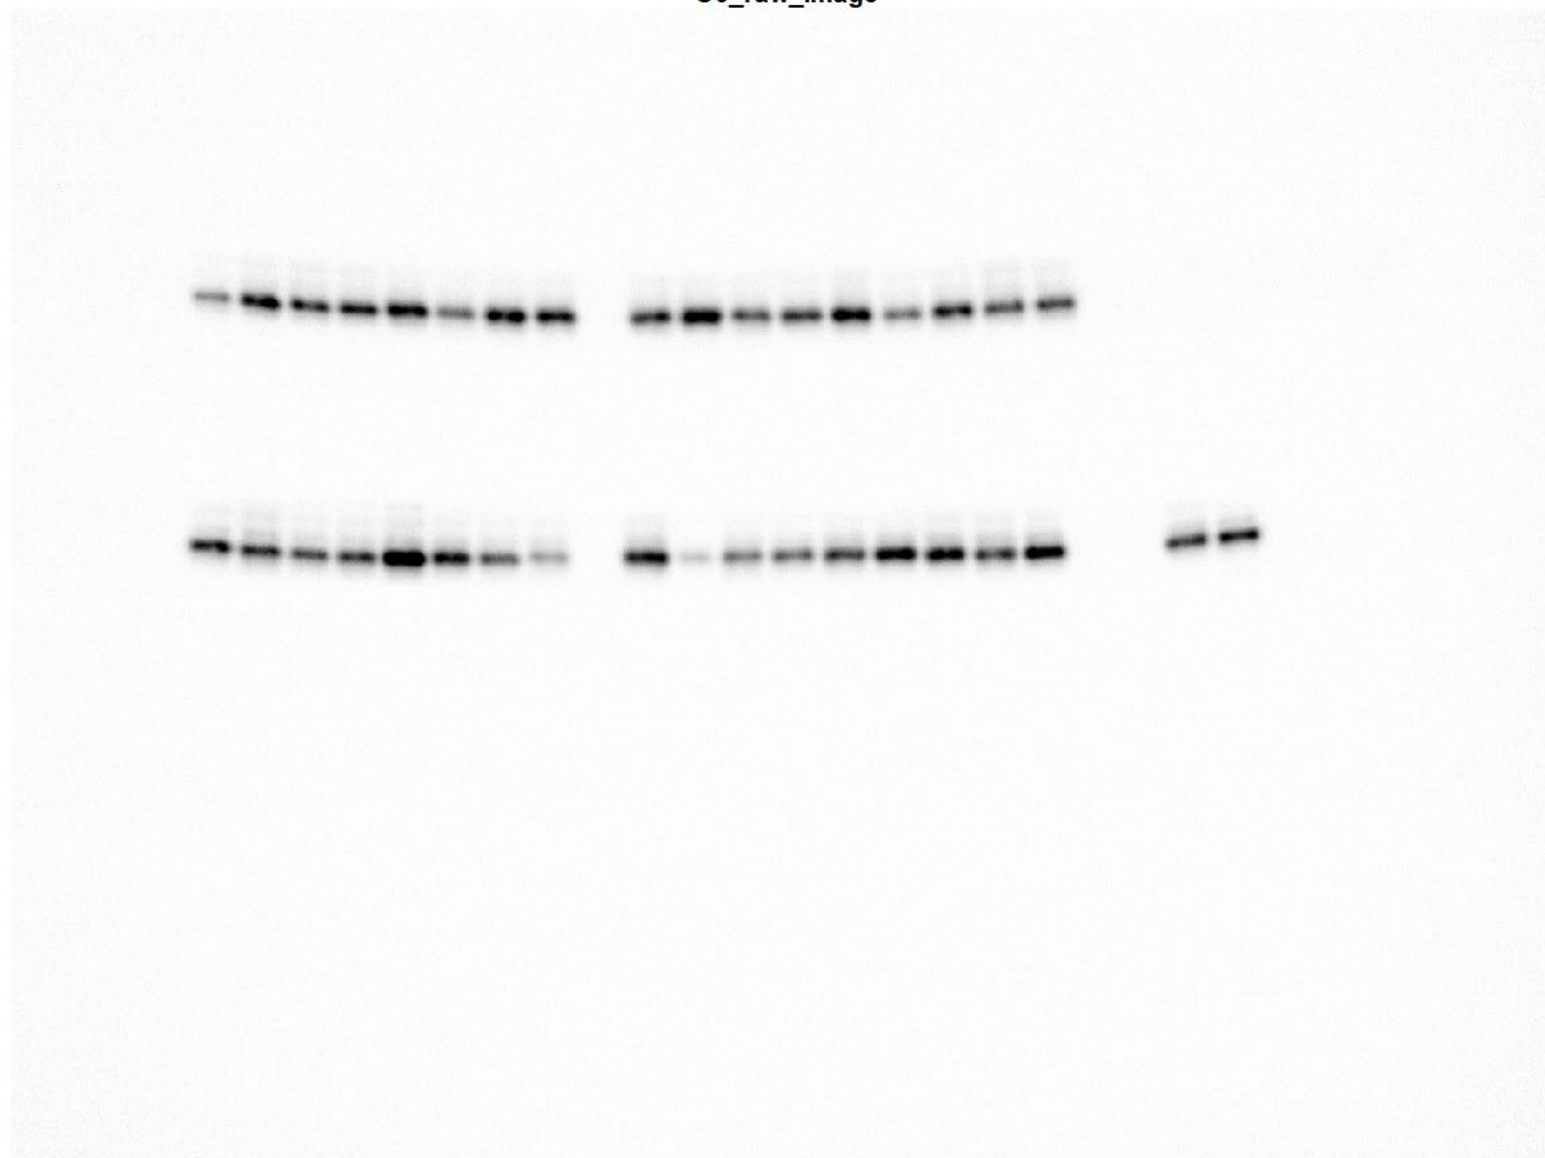

Non\_p\_4EBP1\_raw\_image

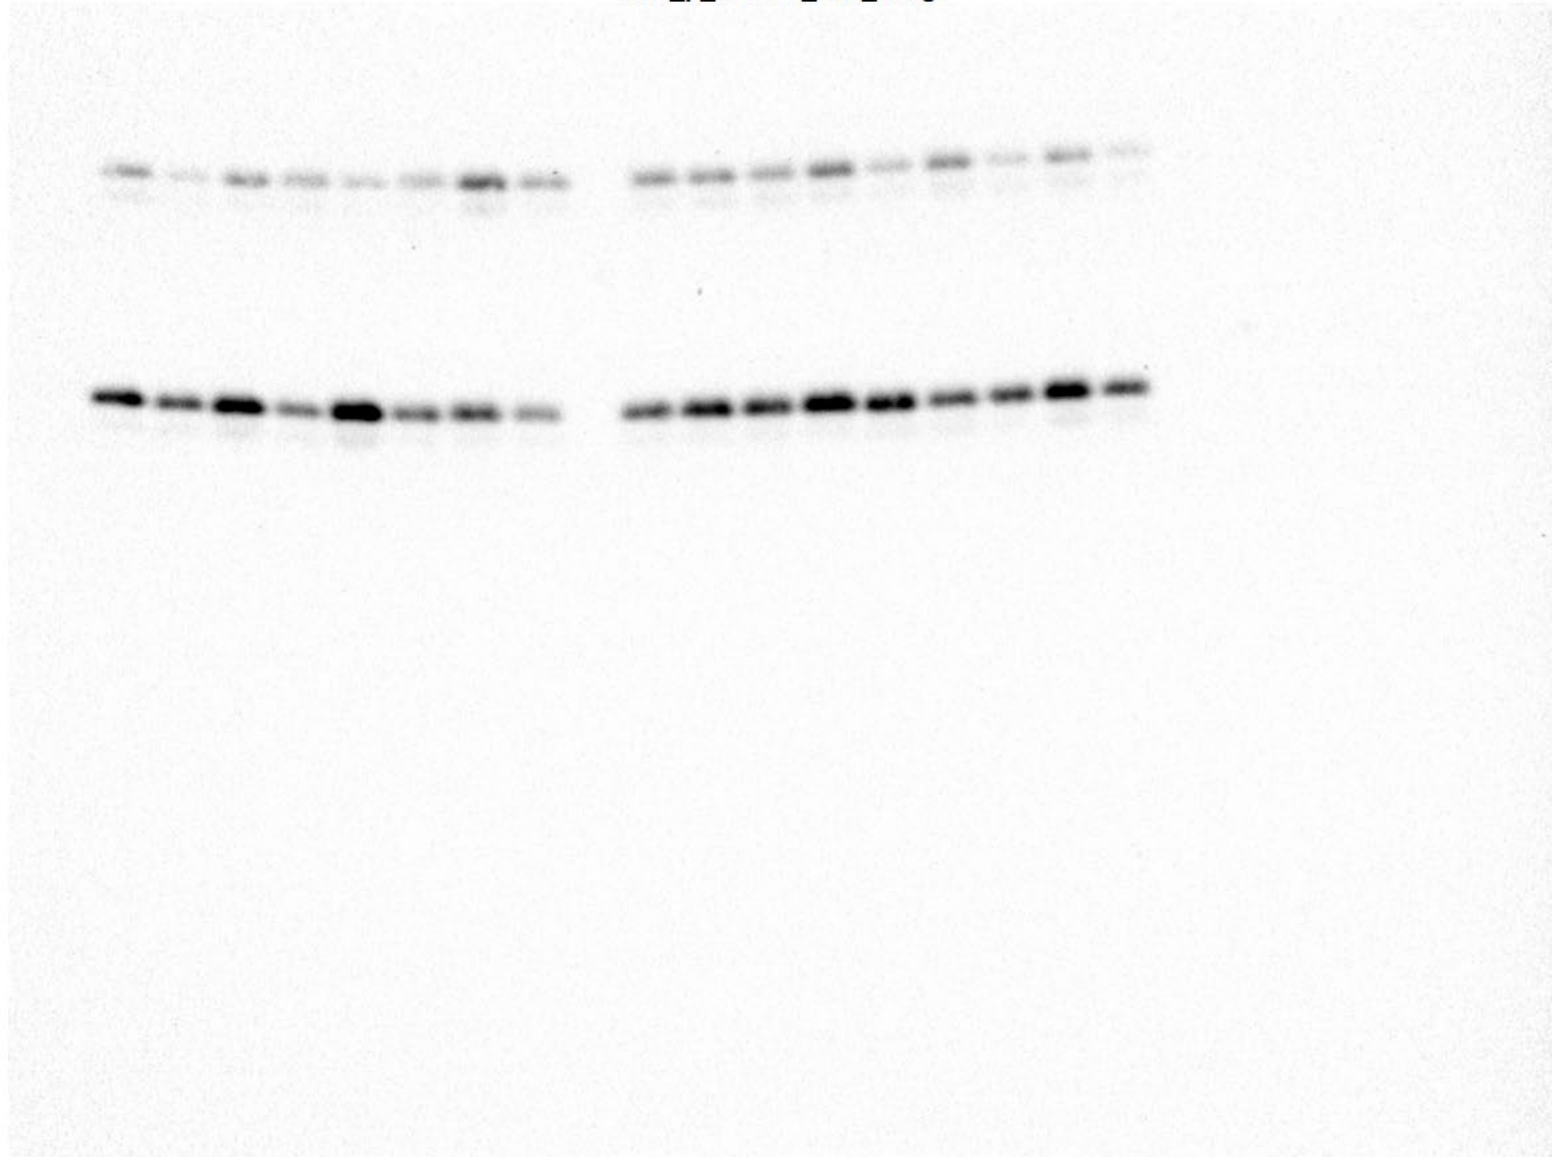

4EBP1\_raw\_image

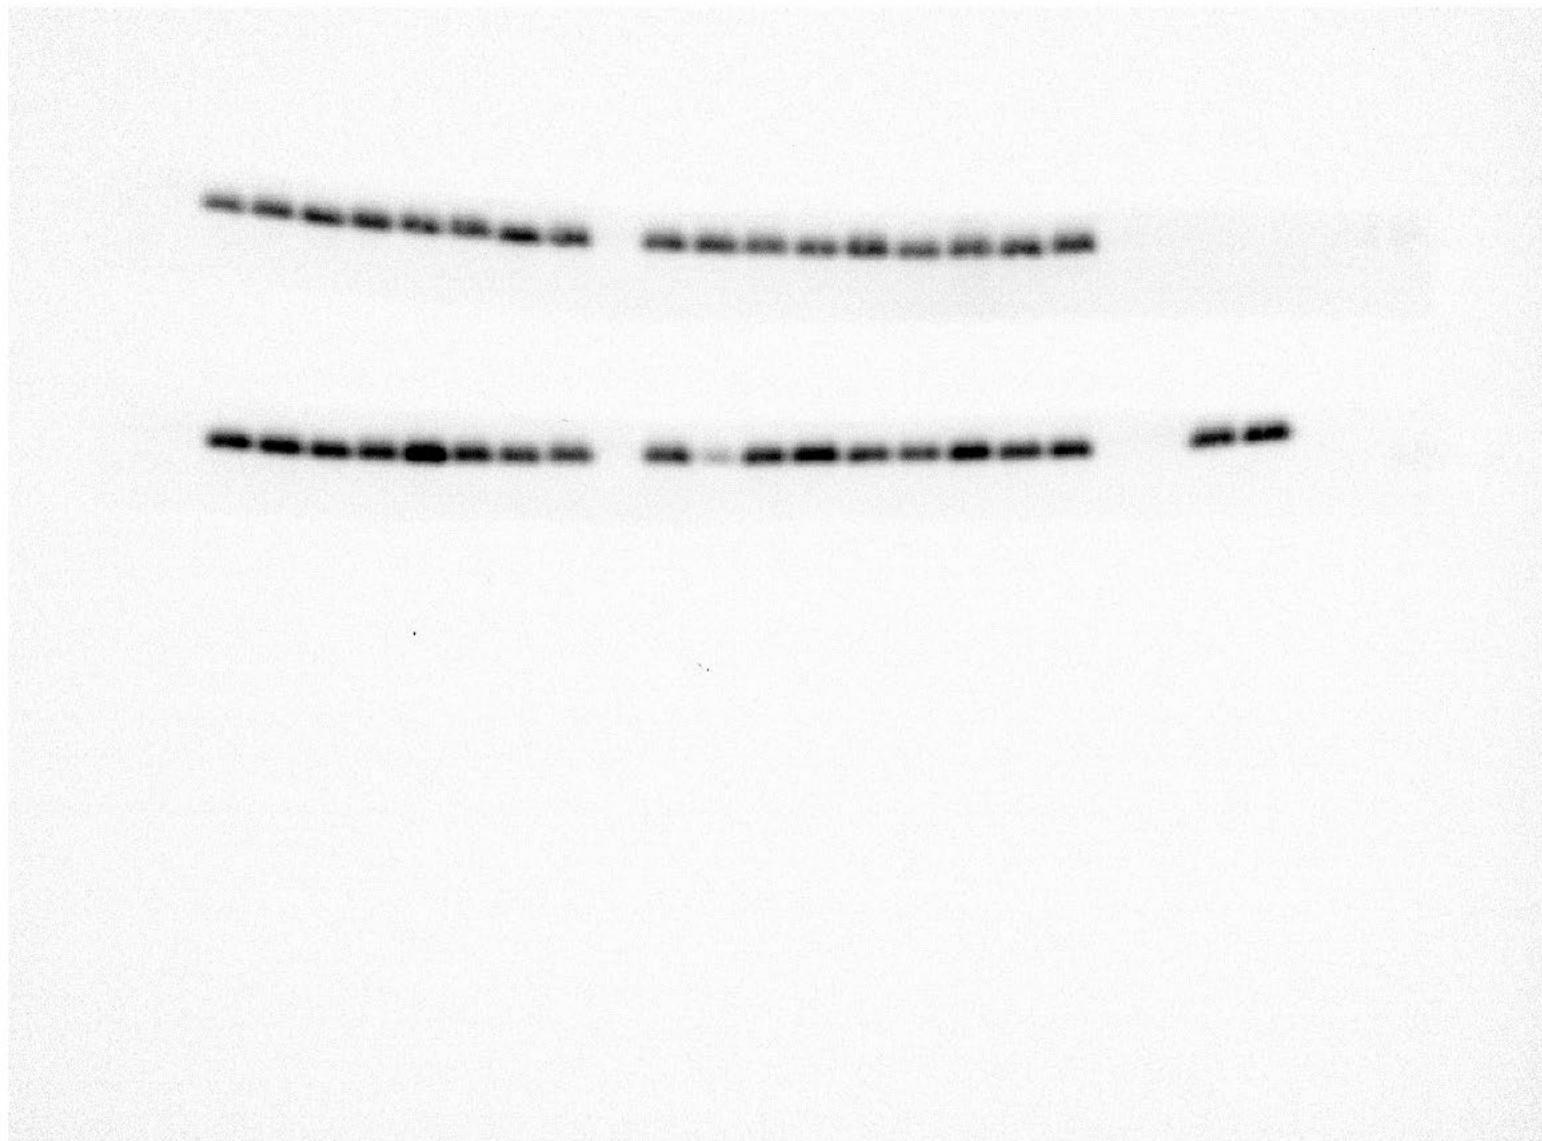

pULK555\_raw\_image

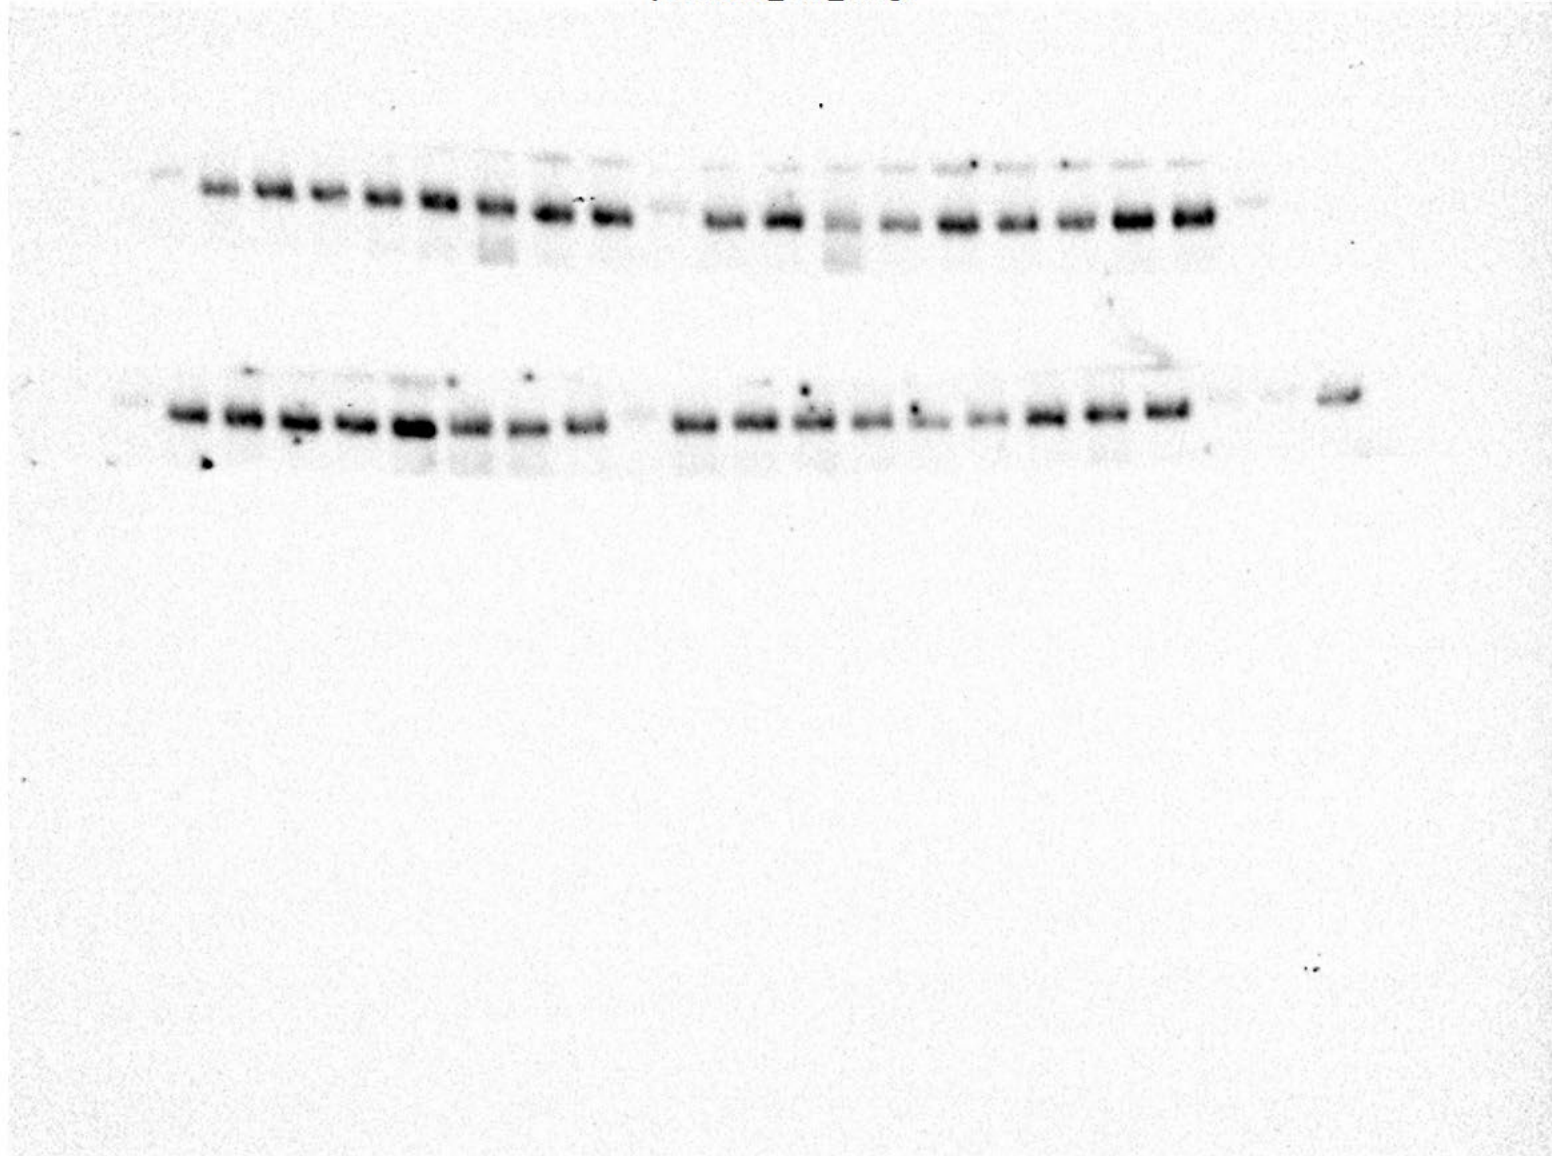

pULK757\_raw\_image

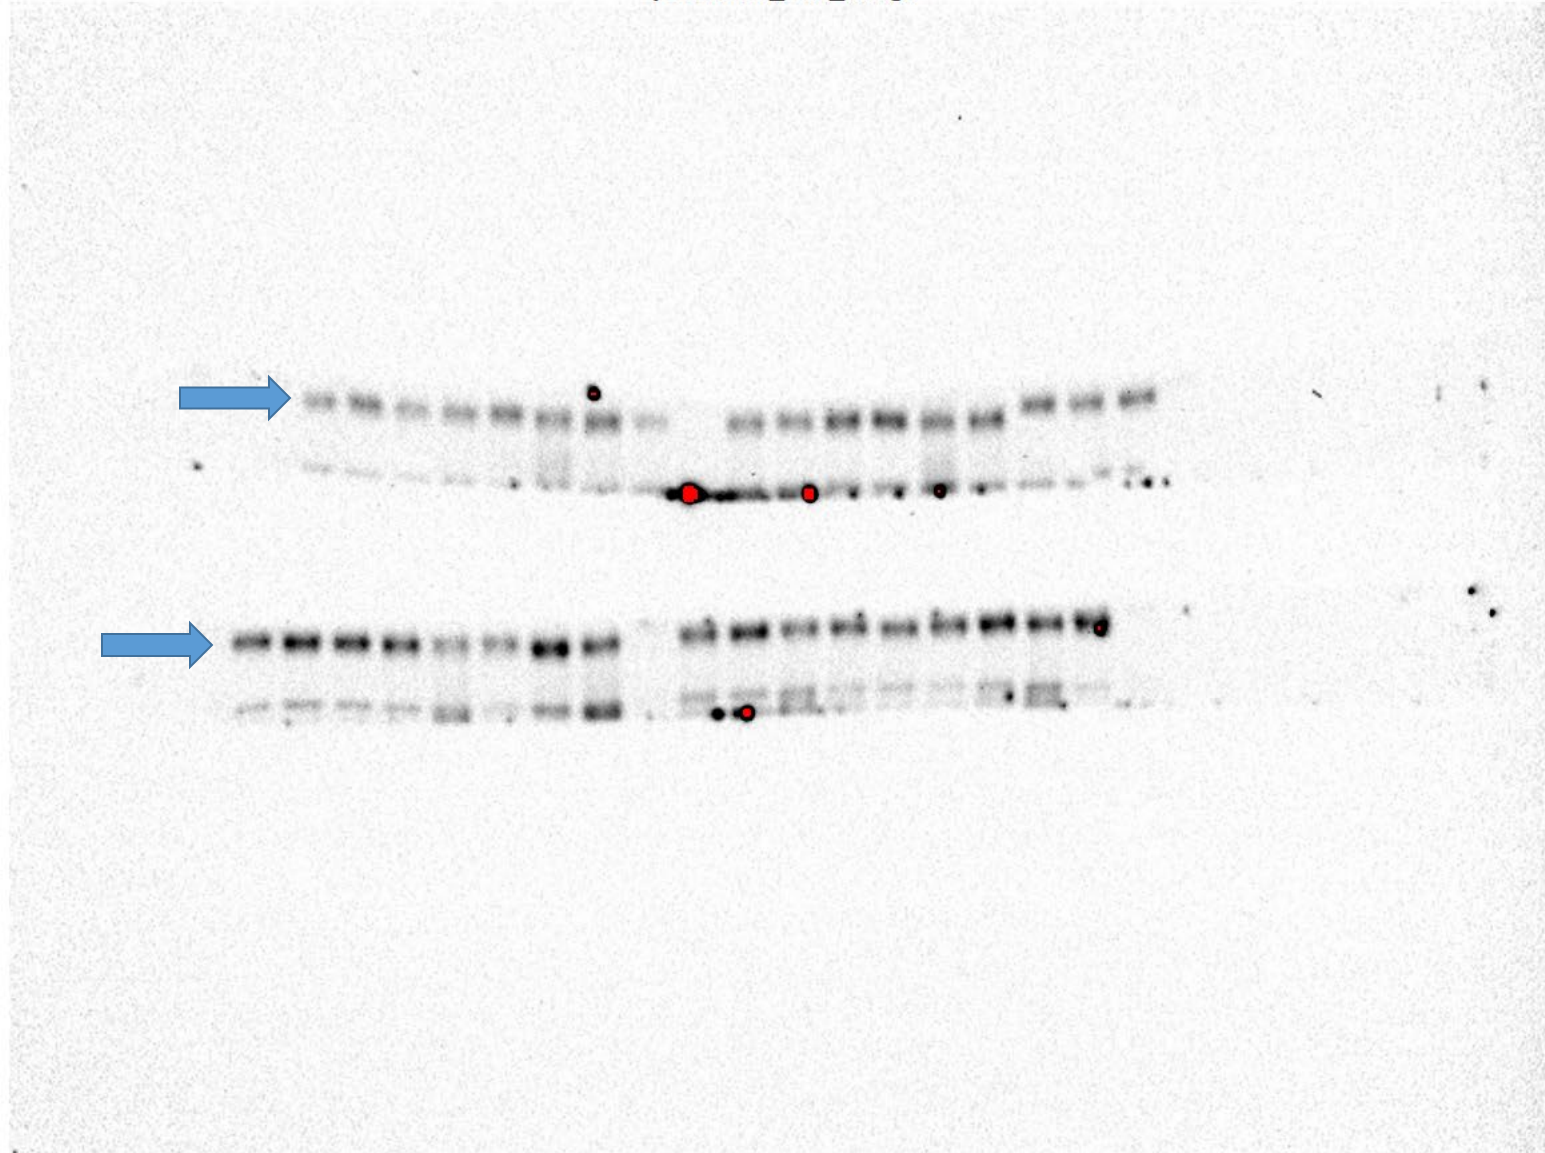

ULK1\_raw\_image

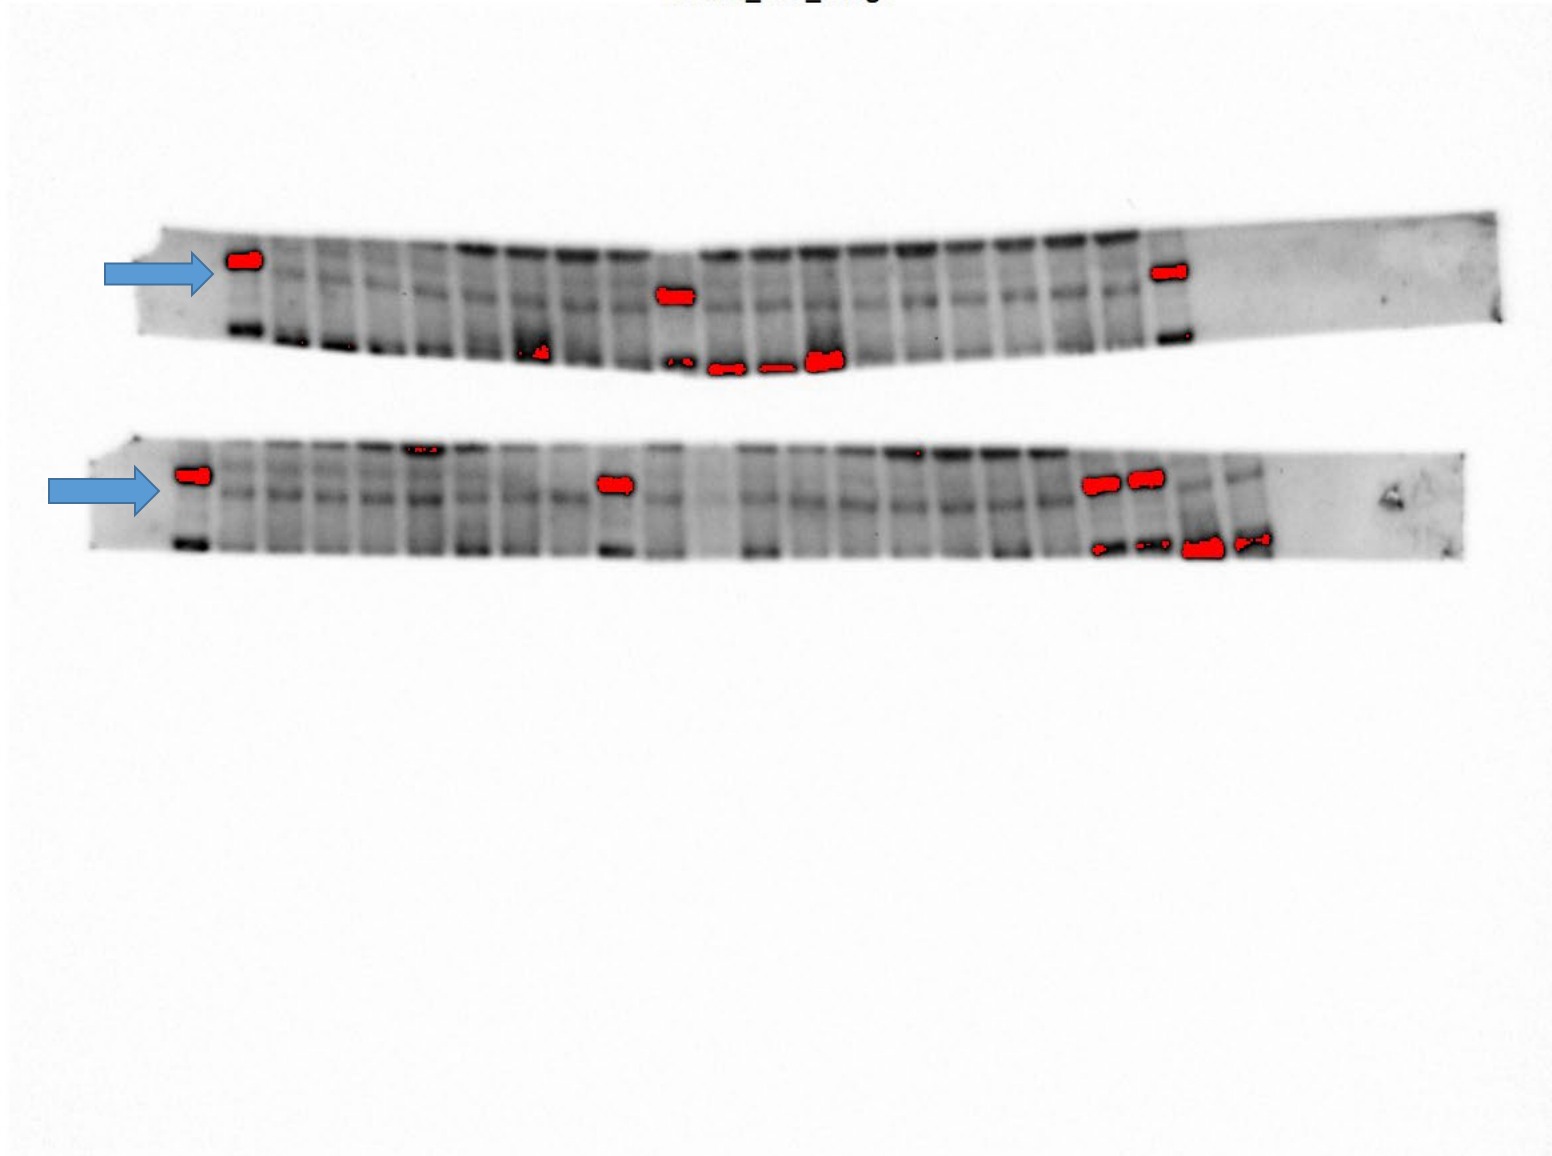

Fxb32\_raw\_image

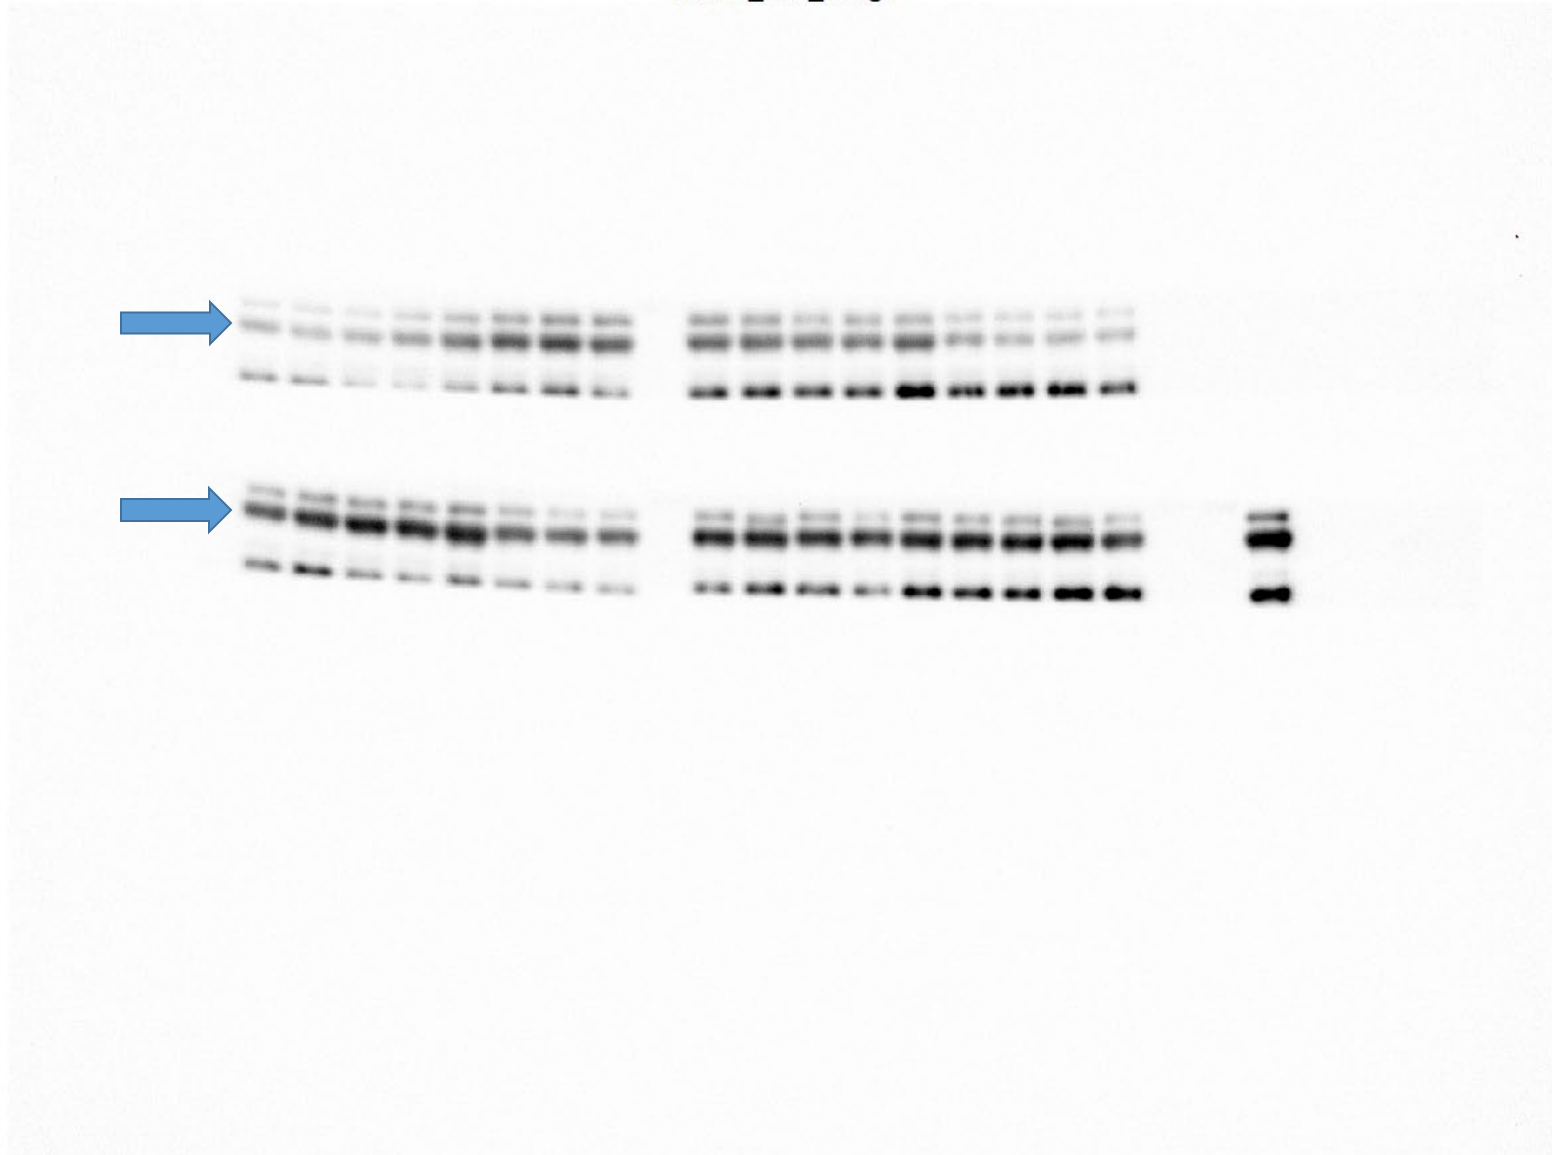

MURF1\_raw\_image

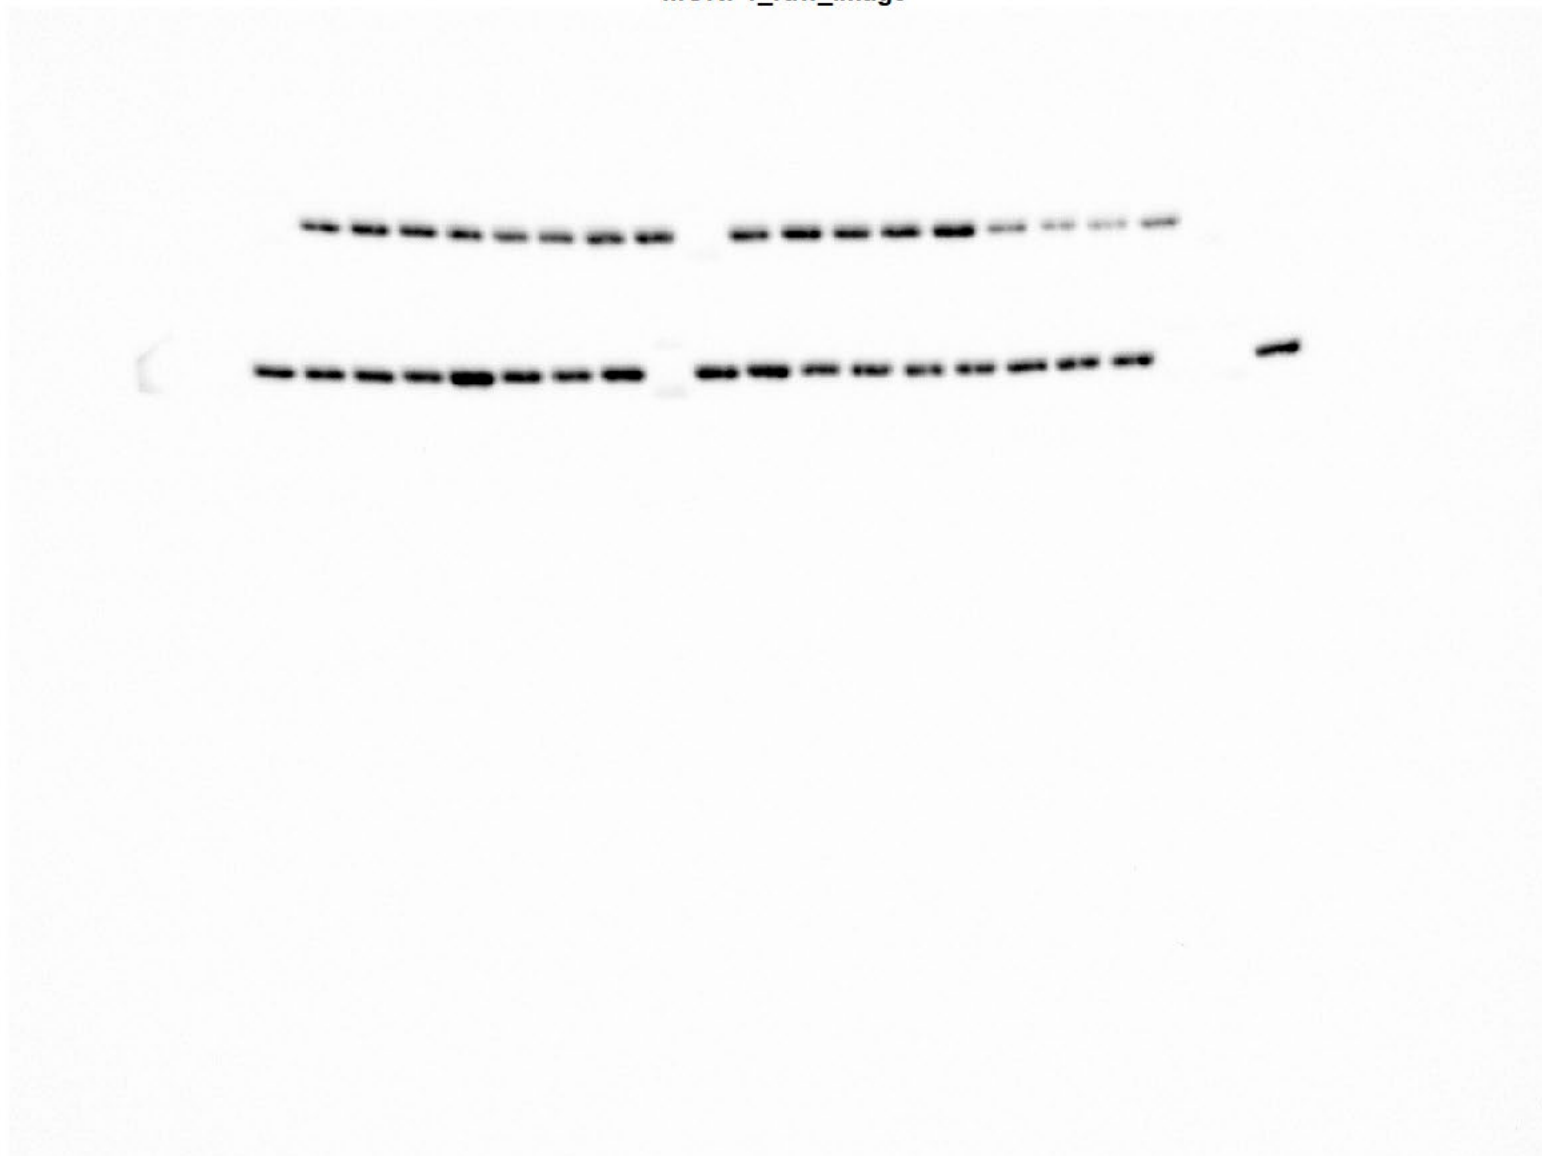

p62\_raw\_image

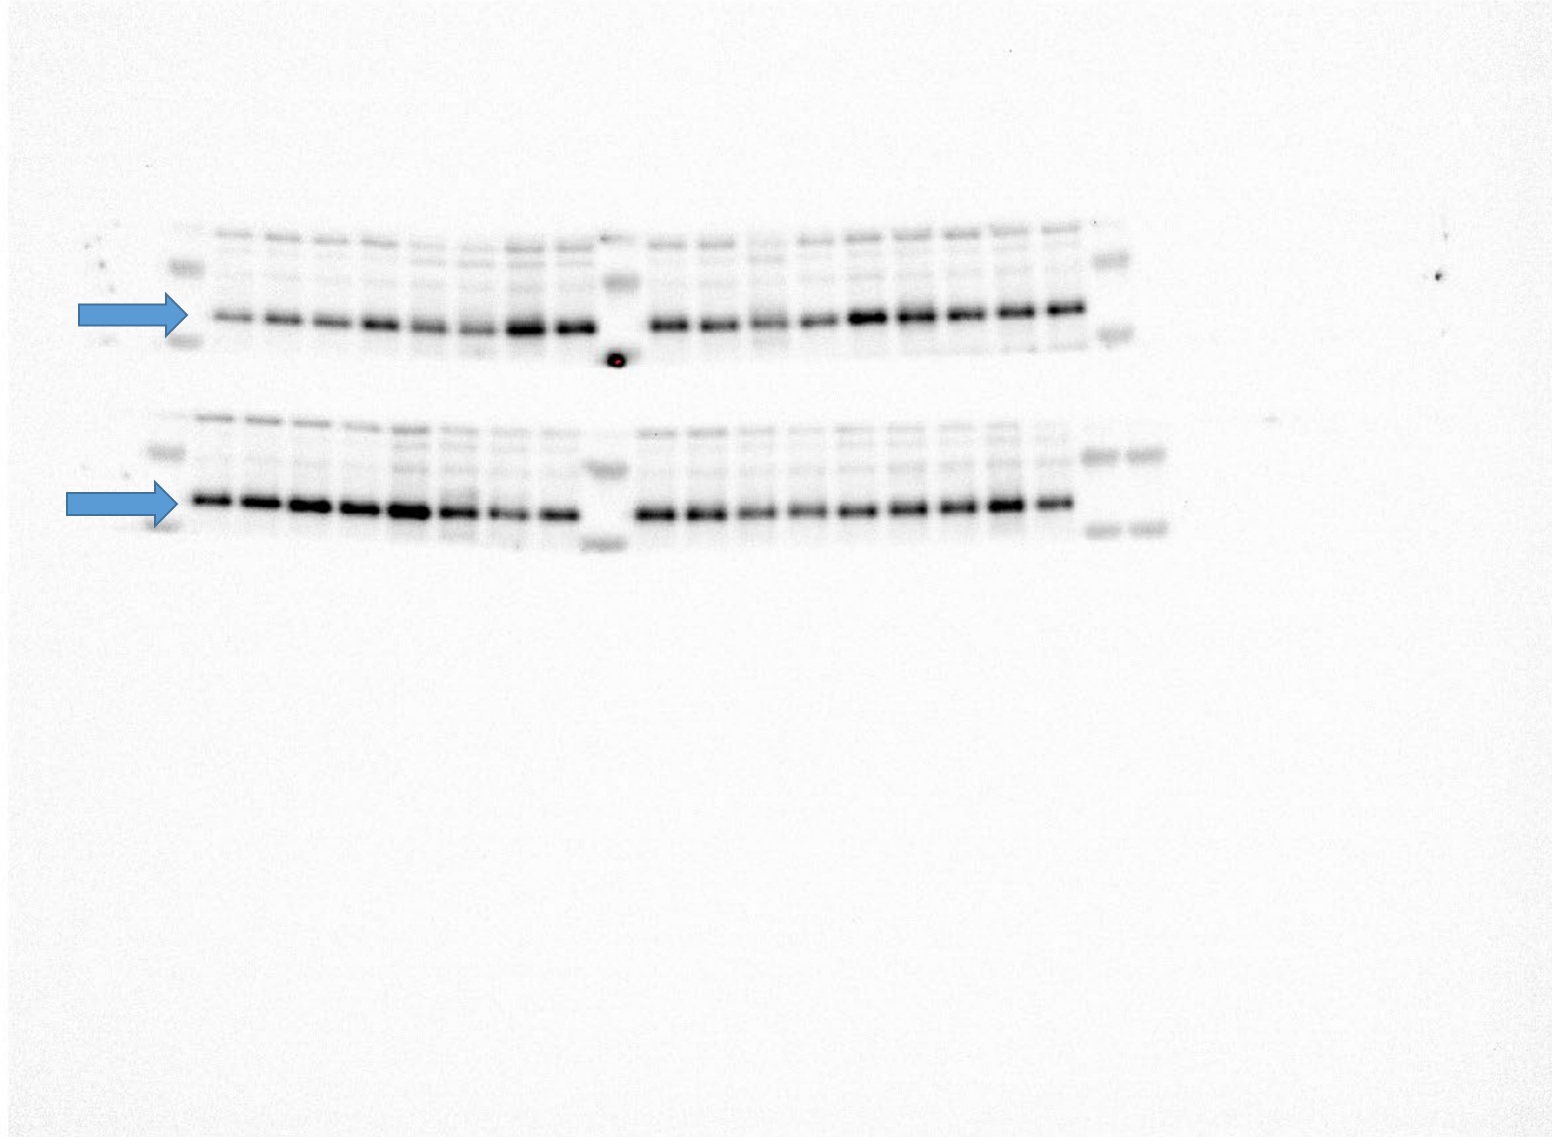

Source: https://storage.googleapis.com/plos-corpus-prod/10.1371/journal.pone.0241274/1/pone.0241274.s002.pdf
